# Supplementary material
Source: MDPI journal article supplement (https://www.mdpi.com/2673-5172/2/4/34)
Supplement: s1 [file s1]

## Killing the comments – Supplementary Material

**Table S1.** Codebook utilized to code comment removal statements and policies relying upon a modified grounded theory approach allowing for a focus on language used as well as emergent themes.

| Code                                                 | Definition                                                                                                                                                                    | Example (when necessary)          |
|------------------------------------------------------|-------------------------------------------------------------------------------------------------------------------------------------------------------------------------------|-----------------------------------|
| <b>Alternative Efforts to Connect with Audiences</b> | Use when orgs describe alternatives to own site-hosted platform comments                                                                                                      | i.e. continue the conversation    |
| How to Contact                                       | Use when specific communication alternatives are discussed                                                                                                                    | i.e. write a letter to the editor |
| <b>Bad Commenting Practices</b>                      | Most frequent words, phrases, language used to describe unacceptable commenting; Code any variant of each word to appropriate subnode; Code to both sub nodes and parent node |                                   |
| Abuse                                                |                                                                                                                                                                               |                                   |
| Commercial Promotion                                 |                                                                                                                                                                               |                                   |
| Direct or Indirect Attacks                           |                                                                                                                                                                               |                                   |
| Hate                                                 |                                                                                                                                                                               |                                   |
| In Relation to Article Subjects                      |                                                                                                                                                                               |                                   |
| In Relation to Journalists                           |                                                                                                                                                                               |                                   |
| Insults                                              |                                                                                                                                                                               |                                   |
| Intention to Derail, Hijack, or Bait Others          |                                                                                                                                                                               |                                   |
| Negativity                                           |                                                                                                                                                                               |                                   |
| Obscenity                                            |                                                                                                                                                                               |                                   |
| Off Topic Discussion                                 |                                                                                                                                                                               |                                   |
| Offensive                                            |                                                                                                                                                                               |                                   |
| Prejudice                                            |                                                                                                                                                                               |                                   |
| Anti-Jewish                                          |                                                                                                                                                                               |                                   |
| Homophobia                                           |                                                                                                                                                                               |                                   |
| Misogyny                                             |                                                                                                                                                                               |                                   |
| Racism                                               |                                                                                                                                                                               |                                   |
| Rudeness                                             |                                                                                                                                                                               |                                   |

|                                                       |                                                                                                                                                                             |                                                                                                                       |
|-------------------------------------------------------|-----------------------------------------------------------------------------------------------------------------------------------------------------------------------------|-----------------------------------------------------------------------------------------------------------------------|
| Shouting                                              |                                                                                                                                                                             |                                                                                                                       |
| Spam                                                  | Including bots                                                                                                                                                              |                                                                                                                       |
| Vulgarity                                             |                                                                                                                                                                             |                                                                                                                       |
| <b>Comment Moderation Decisions</b>                   | Use when orgs describe how and/or why they moderate comments; code to subnode when relevant                                                                                 | i.e. we have a team of moderators working around the clock; OR there are more commenters than moderators .. etc. etc. |
| Automation                                            | Use when orgs describe an automatic process by which comments are moderated                                                                                                 |                                                                                                                       |
| Case-by-Case Comment Allowance                        | Use when orgs describe some comments as permissible                                                                                                                         |                                                                                                                       |
| Human moderation and or moderation teams              | Use when human moderation is described in any way (cross coding ok)                                                                                                         |                                                                                                                       |
| Outsourcing of Comment Moderation                     | Use when outsourcing is described                                                                                                                                           | i.e. social media                                                                                                     |
| Selective Comment Activation                          | Use when orgs describe how/why they choose which articles on which to allow commenting                                                                                      |                                                                                                                       |
| <b>Connection or Community Building</b>               | Use when orgs reference the idea that commenting or interaction with readers builds community                                                                               |                                                                                                                       |
| <b>Effects or Expected Outcome of Comment Removal</b> | When orgs describe the expected outcome of their decisions regarding commenting; Parent node; code to sub nodes when applicable                                             |                                                                                                                       |
| Comments or Discussions Hosted Elsewhere              |                                                                                                                                                                             | i.e. social media                                                                                                     |
| Effects of Incivility in Comments                     | When orgs describe consequences of bad commenting                                                                                                                           | i.e. journalists' mental health, misinformation, community discord, etc.                                              |
| Importance and or Primacy of Conversation             | The desire to continue commenting in a civil way                                                                                                                            |                                                                                                                       |
| Possibility of Temporary Removal                      | When orgs describe leaving the door open to hosting comments in the future or reversing their current decision                                                              |                                                                                                                       |
| Scaling Back Comment Section(s)                       |                                                                                                                                                                             |                                                                                                                       |
| <b>Good Commenting Practices</b>                      | Most frequent words, phrases, language used to describe acceptable commenting; Code any variant of each word to appropriate subnode; Code to both sub nodes and parent node |                                                                                                                       |
| Active Engagement                                     |                                                                                                                                                                             |                                                                                                                       |

|                                     |                                                                                                                                                                                       |
|-------------------------------------|---------------------------------------------------------------------------------------------------------------------------------------------------------------------------------------|
| Articulate                          |                                                                                                                                                                                       |
| Considered                          |                                                                                                                                                                                       |
| Constructive                        |                                                                                                                                                                                       |
| Critical and or Criticism           |                                                                                                                                                                                       |
| Enjoyable                           |                                                                                                                                                                                       |
| Informed                            |                                                                                                                                                                                       |
| Insight, opinion, or idea           |                                                                                                                                                                                       |
| Intellectual                        |                                                                                                                                                                                       |
| Intelligent                         |                                                                                                                                                                                       |
| Lively Discussion                   |                                                                                                                                                                                       |
| Maintains Civil Atmosphere          |                                                                                                                                                                                       |
| Polite                              |                                                                                                                                                                                       |
| Respectful                          |                                                                                                                                                                                       |
| Smart                               |                                                                                                                                                                                       |
| Thoughtful                          |                                                                                                                                                                                       |
| Vibrant                             |                                                                                                                                                                                       |
| Lack of Anonymity                   |                                                                                                                                                                                       |
| <b>Language Describing Removals</b> | <p>Most frequent words, phrases, language used to describe comment removal; Code any variant of each word to appropriate subnode; Code to both sub nodes and parent node</p> <p>0</p> |
| Close and or Closure                |                                                                                                                                                                                       |
| Ending                              |                                                                                                                                                                                       |
| Killing                             |                                                                                                                                                                                       |
| Removed                             |                                                                                                                                                                                       |
| Shut Off                            |                                                                                                                                                                                       |
| <b>Loss of Commenting Privilege</b> | When orgs describe users banned from commenting                                                                                                                                       |
| <b>Reader Reaction</b>              | When orgs reference their understanding that readers will react to their decision in a particular way                                                                                 |
| Criticism of Decision               | Assumptions of negative reader/public reaction                                                                                                                                        |

|                                               |                                                                                                                                                                                     |
|-----------------------------------------------|-------------------------------------------------------------------------------------------------------------------------------------------------------------------------------------|
| Support for Decision                          | Assumptions of positive reader/public reaction                                                                                                                                      |
| <b>Reasons for Removing Comment Functions</b> | Most frequent words, phrases, language used to describe reasoning for comment removal; Code any variant of each word to appropriate subnode; Code to both sub nodes and parent node |
| Accessibility                                 |                                                                                                                                                                                     |
| Lack of Civility                              |                                                                                                                                                                                     |
| No Longer Useful                              |                                                                                                                                                                                     |
| Sensitive Stories and or Content              |                                                                                                                                                                                     |
| Skewing Public Perception or Opinion          |                                                                                                                                                                                     |
| Social Media Discussion                       |                                                                                                                                                                                     |
| <b>Social Media</b>                           | Use whenever each SM platform is referenced in any context                                                                                                                          |
| Facebook                                      |                                                                                                                                                                                     |
| Instagram                                     |                                                                                                                                                                                     |
| Journalist Accounts                           |                                                                                                                                                                                     |
| Reddit                                        |                                                                                                                                                                                     |
| Tumblr                                        |                                                                                                                                                                                     |
| Twitter                                       |                                                                                                                                                                                     |
